# Supplementary material for: Pilot Study on the Effect of Biophysical Therapy on Salivary Alpha-Amylase as a Surrogate Measure of Anxiety/Stress: In Search of a Novel Noninvasive Molecular Approach for the Management of Stress
Source: PubMed Central journal article supplement (PMC7014022; doi:10.3390/ijms21020415), 2020-01-09
Supplement: ijms-21-00415-s001.pdf [file ijms-21-00415-s001.pdf]

Supplementary Material Table 1. Recommended cut-off scores for conventional severity labels according to Lovibond et al. 1995.

| Severity level   | Depression | Anxiety | Stress |
|------------------|------------|---------|--------|
| Normal           | 0-9        | 0-7     | 0-14   |
| Mild             | 10-13      | 8-9     | 15-18  |
| Moderate         | 14-20      | 10-14   | 19-25  |
| Severe           | 21-27      | 15-19   | 26-33  |
| Extremely severe | 28+        | 20+     | 34+    |

The 3 DASS-21 scales encompass 7 different items, divided into subscales. The depression scale evaluates dysphoria, hopelessness, devaluation of life, self-deprecation, lack of interest / involvement, anhedonia and inertia. The anxiety scale assesses autonomic arousal, skeletal muscle effects, situational anxiety, and subjective experience of anxious affect. The stress scale is sensitive to levels of chronic non-specific arousal. It assesses difficulty relaxing, nervous arousal, and being easily upset/agitated, irritable/over-reactive and impatient.
